# Supplementary material
Source: MDPI journal article supplement (https://www.mdpi.com/2071-1050/9/6/1053)
Supplement: s1 [file s1]

## Sheet: Sheet1
SUPPLEMENT 1 to Sand and dust storms: Impact mitigation by N Middleton & U Kang (Sustainability 2017)
UN member states	UNCCD parties	Reporting entity name	Acronym	Status	RIA	Subregion	SDS source area	SDS deposition area	Soil erosion by wind	Reference
		Afghanistan		ACP	Asia	South Asia	Afghanistan			Walker, A. L., Liu, M., Miller, S. D., Richardson, K. A., & Westphal, D. L. (2009). Development of a dust source database for mesoscale forecasting in southwest Asia. Journal of Geophysical Research: Atmospheres, 114(D18).
		Albania		ACP	Northern Mediterranean	No subregion			Albania	Borrelli, P., Panagos, P., Ballabio, C., Lugato, E., Weynants, M., & Montanarella, L. (2016). Towards a Pan‐European Assessment of Land Susceptibility to Wind Erosion. Land Degradation & Development, 27(4), 1093-1105.
		Algeria		ACP	Africa	Northern Africa	Algeria			Houyou, Z., Bielders, C. L., Benhorma, H. A., Dellal, A., & Boutemdjet, A. (2016). Evidence of strong land degradation by wind erosion as a result of rainfed cropping in the Algerian steppe: a case study at Laghouat. Land Degradation & Development, 27(8), 1788-1796.
Andorra	Andorra
		Angola		ACP	Africa	Southern Africa	Angola			Goudie, A., & Viles, H. (2015). The North East Kunene Region: The Kunene River, Sand Sea and Yardangs. In Landscapes and Landforms of Namibia (pp. 55-59). Springer Netherlands.
		Antigua and Barbuda		ACP	Latin America and the Caribbean	Caribbean
		Argentina		ACP	Latin America and the Caribbean	South Cone	Argentina			Bucher, E.H. and Stein, A.F. (2016). Large salt dust storms follow a 30-year rainfall cycle in the Mar Chiquita Lake (Córdoba, Argentina). PloS one, 11(6), p.e0156672.
		Armenia		ACP	Central and Eastern Europe	No subregion			Armenia	Suvaryan, Y., & Sargsyan, V. (2008). Land and soil resources in Armenia: State of the art and policy measures. In Soil Chemical Pollution, Risk Assessment, Remediation and Security (pp. 229-239). Springer Netherlands.
		Australia		ACP/DCP	Asia	Pacific	Australia			O'Loingsigh, T., Chubb, T., Baddock, M., Kelly, T., Tapper, N. J., De Deckker, P., & McTainsh, G. (2017). Sources and pathways of dust during the Australian ‘Millennium Drought’decade. Journal of Geophysical Research: Atmospheres.
Austria	Austria								Austria	Borrelli, P., Panagos, P., Ballabio, C., Lugato, E., Weynants, M., & Montanarella, L. (2016). Towards a Pan‐European Assessment of Land Susceptibility to Wind Erosion. Land Degradation & Development, 27(4), 1093-1105.
		Azerbaijan		ACP	Central and Eastern Europe	No subregion			Azerbaijan	Babaev, M. P., Gurbanov, E. A., & Ramazanova, F. M. (2015). Main types of soil degradation in the Kura-Aras Lowland of Azerbaijan. Eurasian Soil Science, 48(4), 445-456.
		Bahamas		ACP	Latin America and the Caribbean	Caribbean		Bahamas		Swart, P. K., Oehlert, A. M., Mackenzie, G. J., Eberli, G. P., & Reijmer, J. J. G. (2014). The fertilization of the Bahamas by Saharan dust: A trigger for carbonate precipitation?. Geology, 42(8), 671-674.
		Bahrain		ACP	Asia	West Asia		Bahrain		Jassim, M. S., & Coskuner, G. (2017). Assessment of spatial variations of particulate matter (PM10 and PM2. 5) in Bahrain identified by air quality index (AQI). Arabian Journal of Geosciences, 10(1), 19.
		Bangladesh		ACP	Asia	South Asia
		Barbados		ACP	Latin America and the Caribbean	Caribbean		Barbados		Groß, S., Gasteiger, J., Freudenthaler, V., Müller, T., Sauer, D., Toledano, C., & Ansmann, A. (2016). Saharan dust contribution to the Caribbean summertime boundary layer–a lidar study during SALTRACE. Atmospheric Chemistry and Physics, 16(18), 11535-11546.
		Belarus		ACP	Central and Eastern Europe	No subregion			Belarus	Chernysh, A. F., & Likhatsevich, N. A. (2013). Forecast of soil blowing intensity soils of Belarussian Polesye. Soil Science and Agrochemistry: scientific journal.
Belgium	Belgium								Belgium	Borrelli, P., Panagos, P., Ballabio, C., Lugato, E., Weynants, M., & Montanarella, L. (2016). Towards a Pan‐European Assessment of Land Susceptibility to Wind Erosion. Land Degradation & Development, 27(4), 1093-1105.
		Belize		ACP	Latin America and the Caribbean	Mesoamerica
		Benin		ACP	Africa	Western Africa		Benin		Sunnu, A., Afeti, G., & Resch, F. (2008). A long-term experimental study of the Saharan dust presence in West Africa. Atmospheric Research, 87(1), 13-26.
		Bhutan		ACP	Asia	South Asia			Bhutan	Caspari, T., Bäumler, R., Norbu, C., Tshering, K., & Baillie, I. (2009). Soil formation in Phobjikha Valley, Central Bhutan with special regard to the redistribution of loessic sediments. Journal of Asian Earth Sciences, 34(3), 403-417.
		Bolivia (Plurinational State of)		ACP	Latin America and the Caribbean	Andean	Bolivia (Plurinational State of)			Gaiero, D. M., Simonella, L., Gassó, S., Gili, S., Stein, A. F., Sosa, P., ... & Marelli, H. (2013). Ground/satellite observations and atmospheric modeling of dust storms originating in the high Puna‐Altiplano deserts (South America): Implications for the interpretation of paleo‐climatic archives. Journal of Geophysical Research: Atmospheres, 118(9), 3817-3831.
		Bosnia and Herzegovina		ACP	Central and Eastern Europe	No subregion			Bosnia and Herzegovina	Borrelli, P., Panagos, P., Ballabio, C., Lugato, E., Weynants, M., & Montanarella, L. (2016). Towards a Pan‐European Assessment of Land Susceptibility to Wind Erosion. Land Degradation & Development, 27(4), 1093-1105.
		Botswana		ACP	Africa	Southern Africa	Botswana			Vickery, K. J., Eckardt, F. D., & Bryant, R. G. (2013). A sub‐basin scale dust plume source frequency inventory for southern Africa, 2005–2008. Geophysical Research Letters, 40(19), 5274-5279.
		Brazil		ACP	Latin America and the Caribbean	South Cone			Brazil	Levin, N., Tsoar, H., Herrmann, H. J., Maia, L. P., & CLAUDINO‐SALES, V. A. N. D. A. (2009). Modelling the formation of residual dune ridges behind barchan dunes in North‐east Brazil. Sedimentology, 56(6), 1623-1641.
Brunei Darussalam	Brunei Darussalam
		Bulgaria		ACP/DCP	Central and Eastern Europe	No subregion			Bulgaria	Borrelli, P., Panagos, P., Ballabio, C., Lugato, E., Weynants, M., & Montanarella, L. (2016). Towards a Pan‐European Assessment of Land Susceptibility to Wind Erosion. Land Degradation & Development, 27(4), 1093-1105.
		Burkina Faso		ACP	Africa	Western Africa	Burkina Faso			Tengberg, A. (1995). Nebkha dunes as indicators of wind erosion and land degradation in the Sahel zone of Burkina Faso. Journal of Arid Environments, 30(3), 265-282.
		Burundi		ACP	Africa	Central Africa
		Cabo Verde		ACP	Africa	Western Africa		Cabo Verde		Knippertz, P., Tesche, M., Heinold, B., Kandler, K., Toledano, C., & Esselborn, M. (2011). Dust mobilization and aerosol transport from West Africa to Cape Verde—a meteorological overview of SAMUM‐2. Tellus B, 63(4), 430-447.
		Cambodia		ACP	Asia	South East Asia
		Cameroon		ACP	Africa	Central Africa		Cameroon		Pelt, E., Chabaux, F., Stille, P., Innocent, C., Ghaleb, B., Gérard, M., & Guntzer, F. (2013). Atmospheric dust contribution to the budget of U-series nuclides in soils from the Mount Cameroon volcano. Chemical Geology, 341, 147-157.
Canada	Canada								Canada	Fox, T. A., Barchyn, T. E., & Hugenholtz, C. H. (2012). Successes of soil conservation in the Canadian Prairies highlighted by a historical decline in blowing dust. Environmental Research Letters, 7(1), 014008.
		Central African Republic		ACP	Africa	Central Africa
		Chad		ACP	Africa	Central Africa	Chad			Armitage, S. J., Bristow, C. S., & Drake, N. A. (2015). West African monsoon dynamics inferred from abrupt fluctuations of Lake Mega-Chad. Proceedings of the National Academy of Sciences, 112(28), 8543-8548.
		Chile		ACP/DCP	Latin America and the Caribbean	South Cone	Chile			Artaxo, P., Oyola, P., & Martinez, R. (1999). Aerosol composition and source apportionment in Santiago de Chile. Nuclear Instruments and Methods in Physics Research Section B: Beam Interactions with Materials and Atoms, 150(1), 409-416.
		China		ACP	Asia	East Asia	China			Wang, X., Dong, Z., Zhang, J., & Liu, L. (2004). Modern dust storms in China: an overview. Journal of Arid Environments, 58(4), 559-574.
		Colombia		ACP	Latin America and the Caribbean	Andean		Colombia		Bedoya, A., Nisperuza, D., Alegría, D., Múnera, M., Guerrero-Rascado, J. L., Zapata, C. E., ... & Bastidas, Á. (2016). Strong Saharan Dust Event Detected at Lalinet LOA-UNAL Station, over Medellín, Colombia by Active and Passive Remote Sensing. In EPJ Web of Conferences (Vol. 119, p. 08006). EDP Sciences.
		Comoros		ACP	Africa	Eastern Africa
		Congo		ACP	Africa	Central Africa		Congo		Roberts, G. C., Andreae, M. O., Maenhaut, W., & Fernández‐Jiménez, M. T. (2001). Composition and sources of aerosol in a central African rain forest during the dry season. Journal of Geophysical Research: Atmospheres, 106(D13), 14423-14434.
N	Cook Islands	Cook Islands		ACP	Asia	Pacific
		Costa Rica		ACP	Latin America and the Caribbean	Mesoamerica			Costa Rica	Eklund, T. J., McDowell, W. H., & Pringle, C. M. (1997). Seasonal variation of tropical precipitation chemistry: La Selva, Costa Rica. Atmospheric Environment, 31(23), 3903-3910.
		Côte d'Ivoire		ACP	Africa	Western Africa		Côte d'Ivoire		Sunnu, A., Afeti, G., & Resch, F. (2008). A long-term experimental study of the Saharan dust presence in West Africa. Atmospheric Research, 87(1), 13-26.
		Croatia		ACP/DCP	Northern Mediterranean	No subregion		Croatia		Durn, G., Ottner, F., & Slovenec, D. (1999). Mineralogical and geochemical indicators of the polygenetic nature of terra rossa in Istria, Croatia. Geoderma, 91(1), 125-150.
		Cuba		ACP	Latin America and the Caribbean	Caribbean		Cuba		Barja, B., Mogo, S., Cachorro, V. E., Antuña, J. C., Estevan, R., Rodrigues, A., & de Frutos, Á. (2013). Atmospheric particulate matter levels, chemical composition and optical absorbing properties in Camagüey, Cuba. Environmental Science: Processes & Impacts, 15(2), 440-453.
		Cyprus		ACP/DCP	Northern Mediterranean	No subregion		Cyprus		Middleton, N., Yiallouros, P., Kleanthous, S., Kolokotroni, O., Schwartz, J., Dockery, D. W., ... & Koutrakis, P. (2008). A 10-year time-series analysis of respiratory and cardiovascular morbidity in Nicosia, Cyprus: the effect of short-term changes in air pollution and dust storms. Environmental Health, 7(1), 39.
Czech Republic	Czech Republc								Czech Republc	Borrelli, P., Panagos, P., Ballabio, C., Lugato, E., Weynants, M., & Montanarella, L. (2016). Towards a Pan‐European Assessment of Land Susceptibility to Wind Erosion. Land Degradation & Development, 27(4), 1093-1105.
		Democratic People's Republic of Korea		ACP	Asia	East Asia		DPR Korea		Shao, Y., Yang, Y., Wang, J., Song, Z., Leslie, L. M., Dong, C., ... & Chun, Y. (2003). Northeast Asian dust storms: Real‐time numerical prediction and validation. Journal of Geophysical Research: Atmospheres, 108(D22).
		Democratic Republic of the Congo		ACP	Africa	Central Africa
Denmark	Denmark								Denmark	Borrelli, P., Panagos, P., Ballabio, C., Lugato, E., Weynants, M., & Montanarella, L. (2016). Towards a Pan‐European Assessment of Land Susceptibility to Wind Erosion. Land Degradation & Development, 27(4), 1093-1105.
		Djibouti		ACP	Africa	Eastern Africa		Djibouti		Engelbrecht, J. P., McDonald, E. V., Gillies, J. A., Jayanty, R. K. M., Casuccio, G., & Gertler, A. W. (2009). Characterizing mineral dusts and other aerosols from the Middle East—part 1: ambient sampling. Inhalation toxicology, 21(4), 297-326.
		Dominica		ACP	Latin America and the Caribbean	Caribbean		Dominica		Detres, Y., & Armstrong, R. A. (2003, December). Characterization of viable fungal spores in PM 2.5 filter samples reaching the Eastern Caribbean. In AGU Fall Meeting Abstracts.
		Dominican Republic		ACP	Latin America and the Caribbean	Caribbean		Dominican Republic		Purdy, L. J., Krupa, S. V., & Dean, J. L. (1985). Introduction of sugarcane rust into the Americas and its spread to Florida. Plant Disease, 69(8), 689-693.
		Ecuador		ACP	Latin America and the Caribbean	Andean			Ecuador	Southgate, D., & Whitaker, M. (1992). Promoting resource degradation in Latin America: tropical deforestation, soil erosion, and coastal ecosystem disturbance in Ecuador. Economic development and cultural change, 40(4), 787-807.
		Egypt		ACP	Africa	Northern Africa	Egypt			Hamdan, M. A., Refaat, A. A., & Wahed, M. A. (2016). Morphologic characteristics and migration rate assessment of barchan dunes in the Southeastern Western Desert of Egypt. Geomorphology, 257, 57-74.
		El Salvador		ACP	Latin America and the Caribbean	Mesoamerica
		Equatorial Guinea		ACP	Africa	Central Africa
		Eritrea		ACP	Africa	Eastern Africa	Eritrea			Banks, J. R., Brindley, H. E., Stenchikov, G., & Schepanski, K. (2017). Satellite retrievals of dust aerosol over the Red Sea and the Persian Gulf (2005–2015). Atmospheric Chemistry and Physics, 17(6), 3987-4003.
		Estonia		ACP/DCP	Central and Eastern Europe	No subregion			Estonia	Reintam, L., Kärblane, H., & Petersell, V. (2000). Short report on SOVEUR status in Estonia. Implementation of a Soil Degradation and Vulnerability Database for Central and Eastern Europe (SOVEUR Project), 39.
		Ethiopia		ACP	Africa	Eastern Africa			Ethiopia	Amsalu, A., & de Graaff, J. (2006). Farmers’ views of soil erosion problems and their conservation knowledge at Beressa watershed, central highlands of Ethiopia. Agriculture and Human Values, 23(1), 99-108.
N	European Union								European Union	Borrelli, P., Panagos, P., Ballabio, C., Lugato, E., Weynants, M., & Montanarella, L. (2016). Towards a Pan‐European Assessment of Land Susceptibility to Wind Erosion. Land Degradation & Development, 27(4), 1093-1105.
		Fiji		ACP	Asia	Pacific
Finland	Finland								Finland	Borrelli, P., Panagos, P., Ballabio, C., Lugato, E., Weynants, M., & Montanarella, L. (2016). Towards a Pan‐European Assessment of Land Susceptibility to Wind Erosion. Land Degradation & Development, 27(4), 1093-1105.
France	France								France	Borrelli, P., Panagos, P., Ballabio, C., Lugato, E., Weynants, M., & Montanarella, L. (2016). Towards a Pan‐European Assessment of Land Susceptibility to Wind Erosion. Land Degradation & Development, 27(4), 1093-1105.
		Gabon		ACP	Africa	Central Africa
		Gambia		ACP	Africa	Western Africa		Gambia		Ampomah, G., Energy, E. N. D. A., Samatey, L. B., & Fofana, F. (2012). CLIMATE CHANGE VULNERABILITY ASSESSMENT AND ADAPTATION IN GREATER BANJUL-GAMBIA.
		Georgia		ACP	Central and Eastern Europe	No subregion			Georgia	Didebulidze, A., & Plachter, H. (2002). Nature conservation aspects of pastoral farming in Georgia. In Pasture landscapes and nature conservation (pp. 87-105). Springer Berlin Heidelberg.
Germany	Germany								Germany	Deetz, K., Klose, M., Kirchner, I., & Cubasch, U. (2016). Numerical simulation of a dust event in northeastern Germany with a new dust emission scheme in COSMO-ART. Atmospheric Environment, 126, 87-97.
		Ghana		ACP	Africa	Western Africa		Ghana		Sunnu, A., Afeti, G., & Resch, F. (2008). A long-term experimental study of the Saharan dust presence in West Africa. Atmospheric Research, 87(1), 13-26.
		Greece		ACP/DCP	Northern Mediterranean	No subregion		Greece		Mitsakou, C., Kallos, G., Papantoniou, N., Spyrou, C., Solomos, S., Astitha, M., & Housiadas, C. (2008). Saharan dust levels in Greece and received inhalation doses. Atmospheric Chemistry and Physics, 8(23), 7181-7192.
		Grenada		ACP	Latin America and the Caribbean	Caribbean		Grenada		Akpinar-Elci, M., Martin, F. E., Behr, J. G., & Diaz, R. (2015). Saharan dust, climate variability, and asthma in Grenada, the Caribbean. International journal of biometeorology, 59(11), 1667-1671.
		Guatemala		ACP	Latin America and the Caribbean	Mesoamerica
		Guinea		ACP	Africa	Western Africa		Guinea		Weinstein, J. P., Hedges, S. R., & Kimbrough, S. (2010). Characterization and aerosol mass balance of PM 2.5 and PM 10 collected in Conakry, Guinea during the 2004 Harmattan period. Chemosphere, 78(8), 980-988.
		Guinea-Bissau		ACP	Africa	Western Africa
		Guyana		ACP	Latin America and the Caribbean	Caribbean
		Haiti		ACP	Latin America and the Caribbean	Caribbean
		Honduras		ACP	Latin America and the Caribbean	Mesoamerica			Honduras	Higgins, T. R., & Price, R. A. (1989). Dust and Erosion Control Methods for US Army Construction Projects in Honduras (No. WES/MP/EL-89-6). ARMY ENGINEER WATERWAYS EXPERIMENT STATION VICKSBURG MS ENVIRONMENTAL LAB.
		Hungary		ACP/DCP	Northern Mediterranean	No subregion			Hungary	Mezösi, G., & Szatmári, J. (1998). Assessment of wind erosion risk on the agricultural area of the southern part of Hungary. Journal of hazardous materials, 61(1), 139-153.
Iceland	Iceland						Iceland			Dagsson-Waldhauserova, P., Arnalds, O., & Olafsson, H. (2013). Long-term frequency and characteristics of dust storm events in Northeast Iceland (1949–2011). Atmospheric environment, 77, 117-127.
		India		ACP	Asia	South Asia	India			Badarinath, K. V. S., Kharol, S. K., Kaskaoutis, D. G., & Kambezidis, H. D. (2007). Case study of a dust storm over Hyderabad area, India: its impact on solar radiation using satellite data and ground measurements. Science of the Total Environment, 384(1), 316-332.
		Indonesia		ACP	Asia	South East Asia			Indonesia	Carson, B. (1989). Soil conservation strategies for upland areas of Indonesia.
		Iran (Islamic Republic of)		ACP	Asia	West Asia	Iran (Islamic Republic of)			Rashki, A., Kaskaoutis, D. G., Eriksson, P. G., Qiang, M., & Gupta, P. (2012). Dust storms and their horizontal dust loading in the Sistan region, Iran. Aeolian Research, 5, 51-62.
		Iraq		ACP	Asia	West Asia	Iraq			Moridnejad, A., Karimi, N., & Ariya, P. A. (2015). Newly desertified regions in Iraq and its surrounding areas: Significant novel sources of global dust particles. Journal of Arid Environments, 116, 1-10.
Ireland	Ireland								Ireland	Borrelli, P., Panagos, P., Ballabio, C., Lugato, E., Weynants, M., & Montanarella, L. (2016). Towards a Pan‐European Assessment of Land Susceptibility to Wind Erosion. Land Degradation & Development, 27(4), 1093-1105.
		Israel		ACP/DCP	Northern Mediterranean	No subregion	Israel			Offer, Z. Y., & Goossens, D. (2001). Ten years of aeolian dust dynamics in a desert region (Negev desert, Israel): analysis of airborne dust concentration, dust accumulation and the high-magnitude dust events. Journal of Arid Environments, 47(2), 211-249.
		Italy		ACP/DCP	Northern Mediterranean	No subregion		Italy		Mallone, S., Stafoggia, M., Faustini, A., Gobbi, G. P., Marconi, A., & Forastiere, F. (2011). Saharan dust and associations between particulate matter and daily mortality in Rome, Italy. Environmental health perspectives, 119(10), 1409.
		Jamaica		ACP	Latin America and the Caribbean	Caribbean		Jamaica		Muhs, D. R., & Budahn, J. R. (2009). Geochemical evidence for African dust and volcanic ash inputs to terra rossa soils on carbonate reef terraces, northern Jamaica, West Indies. Quaternary International, 196(1), 13-35.
Japan	Japan							Japan		Mori, I., Nishikawa, M., Tanimura, T., & Quan, H. (2003). Change in size distribution and chemical composition of kosa (Asian dust) aerosol during long-range transport. Atmospheric Environment, 37(30), 4253-4263.
		Jordan		ACP	Asia	West Asia	Jordan			Cao, H., Amiraslani, F., Liu, J., & Zhou, N. (2015). Identification of dust storm source areas in West Asia using multiple environmental datasets. Science of the Total Environment, 502, 224-235.
		Kazakhstan		ACP	Asia	Central Asia	Kazakhstan			Indoitu, R., Orlovsky, L., & Orlovsky, N. (2012). Dust storms in Central Asia: spatial and temporal variations. Journal of Arid Environments, 85, 62-70.
		Kenya		ACP	Africa	Eastern Africa	Kenya			Léon, J. F., & Legrand, M. (2003). Mineral dust sources in the surroundings of the north Indian Ocean. Geophysical Research Letters, 30(6).
		Kiribati		ACP	Asia	Pacific
		Kuwait		ACP	Asia	West Asia	Kuwait			Alolayan, M. A., Brown, K. W., Evans, J. S., Bouhamra, W. S., & Koutrakis, P. (2013). Source apportionment of fine particles in Kuwait City. Science of the total environment, 448, 14-25.
		Kyrgyzstan		ACP	Asia	Central Asia			Kyrgyzstan	Ashley, L., & Ershova, N. (2013). Climate change trends, impacts, and adaptation in Kara Kulja District, Southern Kyrgyzstan. Oecologia Montana, 21(1), 1-10.
		Lao People's Democratic Republic		ACP	Asia	South East Asia
		Latvia		ACP/DCP	Central and Eastern Europe	No subregion			Latvia	Karklins, A. (2000). Soil degradation status and data availability in Latvia. Implementation of a Soil Degradation and Vulnerability Database for Central and Eastern Europe (SOVEUR Project), 51.
		Lebanon		ACP	Asia	West Asia		Lebanon		Dada, L., Mrad, R., Siffert, S., & Saliba, N. A. (2013). Atmospheric markers of African and Arabian dust in an urban eastern Mediterranean environment, Beirut, Lebanon. Journal of Aerosol Science, 66, 187-192.
		Lesotho		ACP	Africa	Southern Africa			Lesotho	Van Zinderen Bakker, E. M. (1981). The high mountains of Lesotho-a botanical paradise. Veld & Flora, 67(4), 106.
		Liberia		ACP	Africa	Western Africa		Liberia		Agwu, E., Amadu, F. O., Morlai, T. A., Wollor, E. T., & Cegbe, L. W. (2011). Agricultural Innovations for Climate Change Adaptation and Food Security in West Africa: The Case of Nigeria, Sierra Leone and Liberia. African Technology Policy Studies Network, 61.
		Libya		ACP	Africa	Northern Africa	Libya			Tulet, P., Mallet, M., Pont, V., Pelon, J., & Boone, A. (2008). The 7–13 March 2006 dust storm over West Africa: Generation, transport, and vertical stratification. Journal of Geophysical Research: Atmospheres, 113(D23).
Liechtenstein	Liechtenstein
Lithuania	Lithuania								Lithuania	Jankauskas, B., Jankauskienė, G., Fullen, M. A., & Booth, C. A. (2008). Utilizing palm-leaf geotextiles to control soil erosion on roadside slopes in Lithuania. Žemės ūkio mokslai (Agricultural Sciences).
Luxembroug	Luxembroug
		Madagascar		ACP	Africa	Southern Africa			Madacascar	Lai, R. (1993). Erosion-crop productivity relationship for soils of Africa. Soil Science Society of America Journal 59(3): 661-667
		Malawi		ACP	Africa	Southern Africa			Malawi	Dregne, H.E. (1990). Erosion and soil productity in Africa. Journal of Soil and Water Conservation. 45(4): 431-436
		Malaysia		ACP	Asia	South East Asia
Maldives	Maldives				Asia
		Mali		ACP	Africa	Western Africa	Mali			Ginoux, P., Prospero, J., Gill, T., Hsu, N., & Zhao, Ming. (2012) Global-scale attribution of anthropogenic and natural dust sources and their emission rates based on MODIS DeeP Blue aerosol products. Review of Geophysics. DOI: 10.1029/2012RG000388
		Malta		ACP/DCP	Northern Mediterranean	No subregion			Malta	Borrelli, P., Lugato, E., Montanarella. L., & Panagos, P. (2016). A new assessment of soil loss due to wind erosion in European agriculural soils using a qantitiative spatially distributed modelling approach. Land Degradation and Development DOI: 10.1002/ldr.2588
		Marshall Islands		ACP	Asia	Pacific
		Mauritania		ACP	Africa	Northern Africa	Mauritania			Ginoux, P., Prospero, J., Gill, T., Hsu, N., & Zhao, Ming. (2012) Global-scale attribution of anthropogenic and natural dust sources and their emission rates based on MODIS DeeP Blue aerosol products. Review of Geophysics. DOI: 10.1029/2012RG000388
		Mauritius		ACP	Africa	Southern Africa
		Mexico		ACP/DCP	Latin America and the Caribbean	Mesoamerica	Mexico			Ginoux, P., Prospero, J., Gill, T., Hsu, N., & Zhao, Ming. (2012) Global-scale attribution of anthropogenic and natural dust sources and their emission rates based on MODIS DeeP Blue aerosol products. Review of Geophysics. DOI: 10.1029/2012RG000388
		Micronesia (Federated States of)		ACP	Asia	Pacific
Monaco	Monaco							Monaco		Pham, M.K., La Rosa, J.J., Lee, S-H., Oregioini, B. & Povinec, P.P. (2005). Deposition of Saharan dust in Monaco rain 2001-2002. Journal of Geophysical Reserch. 106(D10): 325-10,333
		Mongolia		ACP	Asia	East Asia	Mongolia			Sun, J., Zhang, M., & Liu, T. Spacial and temporal characteristics of dust storms in China and its surrounding regions, 1960-1999: relations to source area and climate. Journal of Geophysical Research. 106(D10): 10,325-10,333
		Montenegro		ACP	Central and Eastern Europe	No subregion			Montenegro	Borrelli, P., Lugato, E., Montanarella. L., & Panagos, P. (2016). A new assessment of soil loss due to wind erosion in European agriculural soils using a qantitiative spatially distributed modelling approach. Land Degradation and Development DOI: 10.1002/ldr.2588
		Morocco		ACP	Africa	Northern Africa	Morocco			Salvator, P., Alonso-Perez, s., Pey, J. Artinano, B., de Bustos J.J., Alastuey, A., & Querol, X. (2014). African dust outbreaks over the western Mediteranean Basin: 11-year characterization of atmospheric circulation patterns and dust source areas. Atmos. Chem. Phys., 14, 6759–6775
		Mozambique		ACP	Africa	Southern Africa			Mozambique	Goudie, A. The history and nature of wind erosion in deserts. Annu. Rev. Earth Planet. Sci. 2008. 36:97–119
		Myanmar		ACP	Asia	South East Asia		Myanmar		Liu, Z., Liu, D., Huang, J., Vaughan, M., Uno, I., Sugimoto, N., Kittaka, C., Trepte, C., Wang, Z., Hostetler, C., and Winker, D.: Airborne dust distributions over the Tibetan Plateau and surrounding areas derived from the first year of CALIPSO lidar observations, Atmos. Chem. Phys., 8, 5045-5060, doi:10.5194/acp-8-5045-2008, 2008.
		Namibia		ACP	Africa	Southern Africa	Namibia			Prospero, J. M., P. Ginoux, O. Torres, S. E. Nicholson, and T. E. Gill (2002), Environmental characterization of global sources of atmospheric soil dust identified with the NIMBUS 7 Total Ozone Mapping Spectrometer (TOMS) absorbing aerosol product, Rev. Geophys., 40(1), 1002, doi:10.1029/2000RG000095.
		Nauru		ACP	Asia	Pacific
		Nepal		ACP	Asia	South Asia		Nepal		Carrico, C., Bergin, M., Shrestha, A., Dibb, J., Gomes, L., & Harris, Joyce. (2003). The importance of carbon and mineral dust to seasonal aerosol properties in the Nepal Himalaya. Atmospheric Environment 37(20): 2811-2824
Netherlands	Netherlands								Netherland	Borrelli, P., Lugato, E., Montanarella. L., & Panagos, P. (2016). A new assessment of soil loss due to wind erosion in European agriculural soils using a qantitiative spatially distributed modelling approach. Land Degradation and Development DOI: 10.1002/ldr.2588
New Zealand	New Zealand							New Zealand		Marx, S., Kamber, B., & McGawan, H. (2005). Estimates of Australian dust flux into New Zealand: Quantifying the estern Australian dust plume pathway using trace element calibared Pb as a monitor. Earth and Plantary Science Letters 239: 336-351
		Nicaragua		ACP	Latin America and the Caribbean	Mesoamerica
		Niger		ACP	Africa	Western Africa	Niger			Ginoux, P., Prospero, J., Gill, T., Hsu, N., & Zhao, Ming. (2012) Global-scale attribution of anthropogenic and natural dust sources and their emission rates based on MODIS DeeP Blue aerosol products. Review of Geophysics. DOI: 10.1029/2012RG000388
		Nigeria		ACP	Africa	Western Africa		Nigeria		Longueville, F.D., Hountondji, Y., Henry, S. & Ozer, P. (2010). What do we know about effects of desert dust on air quality and human health in West Africa compared to other regions?. Science of The Total Environment 409(1):1-8
N		Niue		ACP	Asia	Pacific
Norway	Norway								Norway	Borrelli, P., Lugato, E., Montanarella. L., & Panagos, P. (2016). A new assessment of soil loss due to wind erosion in European agriculural soils using a qantitiative spatially distributed modelling approach. Land Degradation and Development DOI: 10.1002/ldr.2588
		Oman		ACP	Asia	West Asia	Oman			Leon, J.F. and Legrand, M. (2003). Mineral dust sources in the surroundings of the north Indian Ocean. Geophys. Res. Lett., 30, 1309, doi:10.1029/2002GL016690, 6.
		Pakistan		ACP	Asia	South Asia	Pakistan			Middleton, N. (1996). A geography of dust storms in South-West Asia. International Journal of Climatology. DOI: 10.1002/joc.3370060207
		Palau		ACP	Asia	Pacific
		Panama		ACP	Latin America and the Caribbean	Mesoamerica		Panama		Diaz, M., Yu, H., Deuerling, K., Wörner, G., Gardner, C., Harmon, R., Goldsmith, S., Carey, A., & Berry Lyons, W. (2016). The flux of Saharan dust to Panama and its influence on soil geochemistry. DOI:10.14644/dust.2016.006
		Papua New Guinea		ACP	Asia	Pacific		Papua New Guinea		McGowan, H., & Clark, A. (2008). Identification of dust transport pathways from Lake Eyre, Australia using Hysplit. Atmospheric Environment, 42(29), 6915-6925.
		Paraguay		ACP	Latin America and the Caribbean	South Cone			Paraguay	Hugo, G. (no dates). Trends in land degradation in South America. Direccion Meteorologica de Chile. Santiago. Chile http://www.wamis.org/agm/pubs/agm10/agm10_12.pdf
		Peru		ACP	Latin America and the Caribbean	Andean			Peru	Alegre, J., Morales, C.F. & Torre, B. (1990). Soil erosion studies in Peru. Journal of Soil and Water Conservation 45(3): 417-420
		Philippines		ACP	Asia	South East Asia		Philippines		McGowan, H., & Clark, A. (2008). Identification of dust transport pathways from Lake Eyre, Australia using Hysplit. Atmospheric Environment, 42(29), 6915-6925.
Poland	Poland								Poland	Borrelli, P., Lugato, E., Montanarella. L., & Panagos, P. (2016). A new assessment of soil loss due to wind erosion in European agriculural soils using a qantitiative spatially distributed modelling approach. Land Degradation and Development DOI: 10.1002/ldr.2588
		Portugal		ACP/DCP	Northern Mediterranean	No subregion			Portugal	Borrelli, P., Lugato, E., Montanarella. L., & Panagos, P. (2016). A new assessment of soil loss due to wind erosion in European agriculural soils using a qantitiative spatially distributed modelling approach. Land Degradation and Development DOI: 10.1002/ldr.2588
		Qatar		ACP	Asia	West Asia	Qatar			Furman, H.K.H. (2003), Dust storms in the Middle East: Source of origine and their temporal characteristics. Indoor and Build Environment. 12(6)
		Republic of Korea		ACP/DCP	Asia	East Asia		Republic of Korea		Chun, Y., Boo, K., Kim, J. & Park, S. (2001). Synopsis, transport, and physical characteristics of Asian dust in Korea. Journal of Geographic Research. 106(D16): 18,461-18,469
		Republic of Moldova		ACP	Central and Eastern Europe	No subregion			Republic of Moldova	Summer, W. (2003). Soil erosion in the Republic of Moldova - the importance of institutional arrangement. Erosion Prediction in Ungangcd Basins: Integrating Methods and Techniques (Proceedings of symposium HSOI held during IUGG2003 at Sapporo. July 2003). IAHS Publ. no. 279. 2003.
		Romania		ACP/DCP	Central and Eastern Europe	No subregion			Romania	Borrelli, P., Lugato, E., Montanarella. L., & Panagos, P. (2016). A new assessment of soil loss due to wind erosion in European agriculural soils using a qantitiative spatially distributed modelling approach. Land Degradation and Development DOI: 10.1002/ldr.2588
		Russian Federation		ACP	Central and Eastern Europe	No subregion			Russian Federation	Larionow, G.A., Skidmore, E.L. & Kiryukhina Z.P. (no dates). Wind erosion in Russia: spreading and quantitative assessment. http://citeseerx.ist.psu.edu/viewdoc/download?doi=10.1.1.576.9565&rep=rep1&type=pdf
		Rwanda		ACP	Africa	Central Africa			Rwanda	Paix, M. J., Lanhai, L., Xi, C., Varenyam, A., Nyongesah, M. J., & Habiyaremye, G. (2013). Physicochemical properties of saline soils and aeolian dust. Land Degradation & Development, 24(6), 539-547.
		Saint Kitts and Nevis		ACP	Latin America and the Caribbean	Caribbean		Saint Kitts and Nevis		Prospero, J., Bonatti, E., Schubert, C. & Carlson T. (1970). Dust in the Caribbean atmosphere traced to an African dust storm. Earth and Plantary Science Letters 9:287-293
		Saint Lucia		ACP	Latin America and the Caribbean	Caribbean		Saint Lucia		Prospero, J., Bonatti, E., Schubert, C. & Carlson T. (1970). Dust in the Caribbean atmosphere traced to an African dust storm. Earth and Plantary Science Letters 9:287-293
		Saint Vincent and the Grenadines		ACP	Latin America and the Caribbean	Caribbean		Saint Vincent and the Grenadines		Prospero, J., Bonatti, E., Schubert, C. & Carlson T. (1970). Dust in the Caribbean atmosphere traced to an African dust storm. Earth and Plantary Science Letters 9:287-293
		Samoa		ACP	Asia	Pacific
San Marino	San Marino
		Sao Tome and Principe		ACP	Africa	Central Africa
		Saudi Arabia		ACP	Asia	West Asia	Saudi Arabia			Furman, H.K.H. (2003), Dust storms in the Middle East: Source of origine and their temporal characteristics. Indoor and Build Environment. 12(6)
		Senegal		ACP	Africa	Western Africa	Senegal			Ginoux, P., Prospero, J., Gill, T., Hsu, N., & Zhao, Ming. (2012) Global-scale attribution of anthropogenic and natural dust sources and their emission rates based on MODIS DeeP Blue aerosol products. Review of Geophysics. DOI: 10.1029/2012RG000388
		Serbia		ACP	Central and Eastern Europe	No subregion			Serbia	Borrelli, P., Lugato, E., Montanarella. L., & Panagos, P. (2016). A new assessment of soil loss due to wind erosion in European agriculural soils using a qantitiative spatially distributed modelling approach. Land Degradation and Development DOI: 10.1002/ldr.2588
		Seychelles		ACP	Africa	Southern Africa
		Sierra Leone		ACP	Africa	Western Africa		Sierra Leone		Nicking W.G. & Gillies J.A. (1993). Dust emission and transport in Mali, West Africa. Sedimentology 40(5): 859-868
		Singapore		ACP	Asia	South East Asia
		Slovakia		ACP/DCP	Central and Eastern Europe	No subregion			Slovakia	Borrelli, P., Lugato, E., Montanarella. L., & Panagos, P. (2016). A new assessment of soil loss due to wind erosion in European agriculural soils using a qantitiative spatially distributed modelling approach. Land Degradation and Development DOI: 10.1002/ldr.2588
		Slovenia		ACP/DCP	Northern Mediterranean	No subregion			Slovenia	Borrelli, P., Lugato, E., Montanarella. L., & Panagos, P. (2016). A new assessment of soil loss due to wind erosion in European agriculural soils using a qantitiative spatially distributed modelling approach. Land Degradation and Development DOI: 10.1002/ldr.2588
		Solomon Islands		ACP	Asia	Pacific
		Somalia		ACP	Africa	Eastern Africa	Somalia			Leon, J.F. and Legrand, M. (2003). Mineral dust sources in the surroundings of the north Indian Ocean. Geophys. Res. Lett. 30(1309) doi:10.1029/2002GL016690, 6.
		South Africa		ACP	Africa	Southern Africa			South Africa	Dougill, A.J. & Thomas A.D. (2002). Nebkha dunes in the Molopo Basin, South Africa and Botswana: formation controls and their validity as indicators of soil degradation. Journal of Arid Environment 50(3): 413-428
South Sudan	South Sudan				Africa
		Spain		ACP/DCP	Northern Mediterranean	No subregion			Spain	Borrelli, P., Lugato, E., Montanarella. L., & Panagos, P. (2016). A new assessment of soil loss due to wind erosion in European agriculural soils using a qantitiative spatially distributed modelling approach. Land Degradation and Development DOI: 10.1002/ldr.2588
		Sri Lanka		ACP	Asia	South Asia		Sri Lanka		Begum, B.A., Biswas, S.K., Pandit, G.G., Saradhi, V., Waheed, S. Siddique, N., Seneviratne, S. Cohen, D., Markwitz, A. & Hopke, P. (2011). Long-range transport of soil dust and smoke pollution in the South Asian region. Atmostherinc Pollution Research 2(2): 151-157
		Sudan		ACP	Africa	Eastern Africa	Sudan			Furman, H.K.H. (2003), Dust storms in the Middle East: Source of origine and their temporal characteristics. Indoor and Build Environment. 12(6)
		Suriname		ACP	Latin America and the Caribbean	Caribbean		Surinam		Formenti, P., Andreae, M.O., Lange, L., Roberts, G., Cafmeyer, J., Rajta, I., Maenhaut, W., Holben, B.N., Artaxo, P., & Leileiveld, J. (2001). Saharan dust in Brazile and Suriname during the Large Scale Biosphere Atomosephere Experimnet in Amazonia (LBA) - Cooperative LBA regional experiment (CLAIRE) in March 1998. Journal of Geophysical Research Atmospheres 106 (D14) 14919-14934
		Swaziland		ACP	Africa	Southern Africa
Sweden	Sweden								Sweden	Borrelli, P., Lugato, E., Montanarella. L., & Panagos, P. (2016). A new assessment of soil loss due to wind erosion in European agriculural soils using a qantitiative spatially distributed modelling approach. Land Degradation and Development DOI: 10.1002/ldr.2588
Switzerland	Switzerland							Switzerland		Schwikowski, M., Seibert, P., Baltensperger, U., & Gaggeler, H.W. (1995). A study of an outstanding Saharan dust event at the high-alpine site Jungraujoch, Switzerland. Atmospheric Evironment 29(15): 1829-1842
		Syrian Arab Republic		ACP	Asia	West Asia	Syria			Hamidi, M., Kavianpour, M.R. & Shao, Synoptic Analysis of Dust Storms in the Middle East. Asia-Pacific J Atmos Sci (2013) 49: 279. doi:10.1007/s13143-013-0027-9
		Tajikistan		ACP	Asia	Central Asia	Tajikistan			Hofer, J., Althausen, D., Abdulhaev, S., Engelmann, R. & Baars H. (2016). Central Asian dust experiment (CADEX): multiwavelenth polarization raman lidar observation in Tajikstan. EPJ Web of Conferences 119(18006)
		Thailand		ACP	Asia	South East Asia
		The former Yugoslav Republic of Macedonia		ACP	Central and Eastern Europe	No subregion			The former Yugoslav Republic of Macedonia	Borrelli, P., Lugato, E., Montanarella. L., & Panagos, P. (2016). A new assessment of soil loss due to wind erosion in European agriculural soils using a qantitiative spatially distributed modelling approach. Land Degradation and Development DOI: 10.1002/ldr.2588
		Timor-Leste		ACP	Asia	South East Asia
		Togo		ACP	Africa	Western Africa		Togo		Longueville, F.D., Hountondji, Y., Henry, S. & Ozer, P. (2010). What do we know about effects of desert dust on air quality and human health in West Africa compared to other regions?. Science of The Total Environment 409(1):1-8
		Tonga		ACP	Asia	Pacific
		Trinidad and Tobago		ACP	Latin America and the Caribbean	Caribbean		Trinidad and Tobago		Gyan, K., Henry, W., Lacaille, S. et al. Int J Biometeorol (2005) 49: 371. doi:10.1007/s00484-005-0257-3
		Tunisia		ACP	Africa	Northern Africa	Tunisia			Hamidi, M., Kavianpour, M.R. & Shao, Synoptic Analysis of Dust Storms in the Middle East. Asia-Pacific J Atmos Sci (2013) 49: 279. doi:10.1007/s13143-013-0027-9
		Turkey		ACP/DCP	Northern Mediterranean	No subregion			Turkey	Alpert, P. & Ganor, E. (2001). Sahara mineral dust measurements from TOMS: Comparison to surface observatinions over the Middle East for the extreme dust storm, March 14-17, 1998. Journal of Geophysical Research: Atmospheres DOI: 10.1029/2000JD900366
		Turkmenistan		ACP	Asia	Central Asia	Turkmenistan			Indoitu, R. Orlovsky, L. & Orlovsky, N. (2012). Dust storms in Central Asia: spacial and temporal variations. Journal of Arid Environments 85:62–70
		Tuvalu		ACP	Asia	Pacific
		Uganda		ACP	Africa	Eastern Africa			Uganda	Dregne, H.E. (1990). Erosion and soil productivity in Africa. Journal of Soil and Water Conservation 45(4): 431-436
		Ukraine		ACP	Central and Eastern Europe	No subregion			Ukraine	Birmili, W., Schepanski, K., Ansmann, A., Spindler, G., Tegen, I., Wehner, B., Nowak, A., Reimer, E., Mattis, I., Müller, K., Brüggemann, E., Gnauk, T., Herrmann, H., Wiedensohler, A., Althausen, D., Schladitz, A., Tuch, T., and Löschau, G.: A case of extreme particulate matter concentrations over Central Europe caused by dust emitted over the southern Ukraine, Atmos. Chem. Phys., 8, 997-1016, do…
		United Arab Emirates		ACP	Asia	West Asia	United Arab Emirates			Kutiel, H. & Furman, H. (2003). Dust storms in the Middle East: Sources of origin and their temporal characteristics. Indoor Built Environ. 12:419-426
United Kingdom	United Kingdom								United Kingdom	Franzen, L., Hjelmroos, M. Kallberg, P., Rapp, A. Mattsson, J. & Brorstrom-Lunden, E. (1995). The Saharan dust episode of south and central Europe, and northern Scandinavia, March 1991. Weather 50(9): 313-318
		United Republic of Tanzania		ACP	Africa	Southern Africa			Tanzania	Myalhyosi, R.B.B. (1992). Influence of livestock grazing on range condition in South-West Masailand, Northern Tanzania. Journal of Applied Ecology 29(3):581-588
		United States of America		ACP/DCP	No region	No subregion	USA			Schubert, S. Suarez, M. Pegion, P., Koster, R. & Bacmeister J. (2004). On the cause of the 1930s Dust Bowl. Science 303(5665): 1855-1859
		Uruguay		ACP	Latin America and the Caribbean	South Cone			Uruguay	Hugo, G. (no dates). Trends in land degradation in South America. Direccion Meteorologica de Chile. Santiago. Chile http://www.wamis.org/agm/pubs/agm10/agm10_12.pdf
		Uzbekistan		ACP	Asia	Central Asia	Uzbekistan			Singer, A., Zobeck, T., Poberezsky, L., & Argaman, E. (2003). The PM10 and PM2.5 dust generation potential of soils/sediments in the Southern Aral Sea Basin, Uzbekistan. Journal of Arid Environment 54(4): 705-728
		Vanuatu		ACP	Asia	Pacific
		Venezuela (Bolivarian Republic of)		ACP	Latin America and the Caribbean	Andean			Venezuela	Andrade, O., Kapas, Martin., & Erasmi, S. (2010). Assessment of erosion hazard in Torres municipality of Lara State (Venezuela) based on GIS. Interciencia: Caracas 35.5: 348-356
		Viet Nam		ACP	Asia	South East Asia			Viet Nam	Hoang, T.T.H., Phan, T.C., Hoang, M.T., Chen, W. and Bell, R.W. (2010). Sandy soils in south central coastal Vietnam: their origin, constraints and management. In: Gilkes RJ, Prakongkep N, editors. Proceedings of the 19th World Congress of Soil Science; Soil Solutions for a Changing World; Published on DVD; http://www.iuss.org, 1 - 6 August, Brisbane, Australia, pp 251-254 pp. 251-254.
		Yemen		ACP	Asia	West Asia	Yemen			Leon, J.F. and Legrand, M. (2003). Mineral dust sources in the surroundings of the north Indian Ocean. Geophys. Res. Lett. 30(1309) doi:10.1029/2002GL016690, 6.
		Zambia		ACP	Africa	Southern Africa			Zambia	Government of the Republic of Zambia (2002). Zambia National Action Programme for combating desertification. Lusaka, Ministry of Tourism, Environment and Natural Resources.
		Zimbabwe		ACP	Africa	Southern Africa			Zimbabwe	Whitlow, R. (1988). Soil erosion and conservation policy in Zimbabwe: Past, present and future. Land Use Policy 5(4): 419-433
		No SDS/wind erosion					SDS source area	SDS deposition area	Soil erosion by wind	No SDS/wind erosion reported			Total
		45				TOTALS	45	44	62	45			196
							SDS source area	SDS deposition area	Soil erosion by wind	No SDS/wind erosion reported			Total
						Annex I (Africa)	18	13	11	12			54
						Annex II (Asia)	20	9	4	21			54
						Annex III (Latin Am and Caribbean)	4	14	8	7			33
						Annex IV (Northern Mediterranean)	1	4	7	0			12
						Annex V (Central and Eastern Europe)	0	0	16	0			16
						Other	2	4	16	5			27
						Total	45	44	62	45			196
